# Supplementary material
Source: Research Square preprint supplement (doi:10.21203/rs.3.rs-9235979/v1)
Supplement: Supplementary file 1 [file 3cc60b73b68836a3757f43c3.docx]

**Supplementary data**

**Effect of a Solanesol-Enriched Extract from *Nicotiana tabacum* L. on Intracellular Oxidative Stress in Endothelial Cells**

Yudeyki Almuiña Guerra1, Oscar Galarce-Bustos* 1, Claudio Aguayo Tapia 2, Camilo Obregón Fernández1, Deliany González Hernández1, Marcia Avello Lorca 1*

1Laboratorio de Farmacognosia, Departamento de Farmacia, Facultad de Farmacia, Universidad de Concepción, Concepción, Chile.

2Departamento de Bioquímica Clínica e Inmunología, Facultad de Química y Farmacia, Universidad de Concepción, Concepción, Chile.

*Corresponding autor: Marcia Avello Lorca*,* Laboratorio de Farmacognosia, Departamento de Farmacia, Facultad de Farmacia, Universidad de Concepción, Concepción, Chile. Email: [maavello@udec.cl](mailto:maavello@udec.cl)

Oscar Galarce-Bustos, Laboratorio de Farmacognosia, Departamento de Farmacia, Facultad de Farmacia, Universidad de Concepción, Concepción, Chile. Email: [oscargalarce@udec.cl](mailto:oscargalarce@udec.cl)


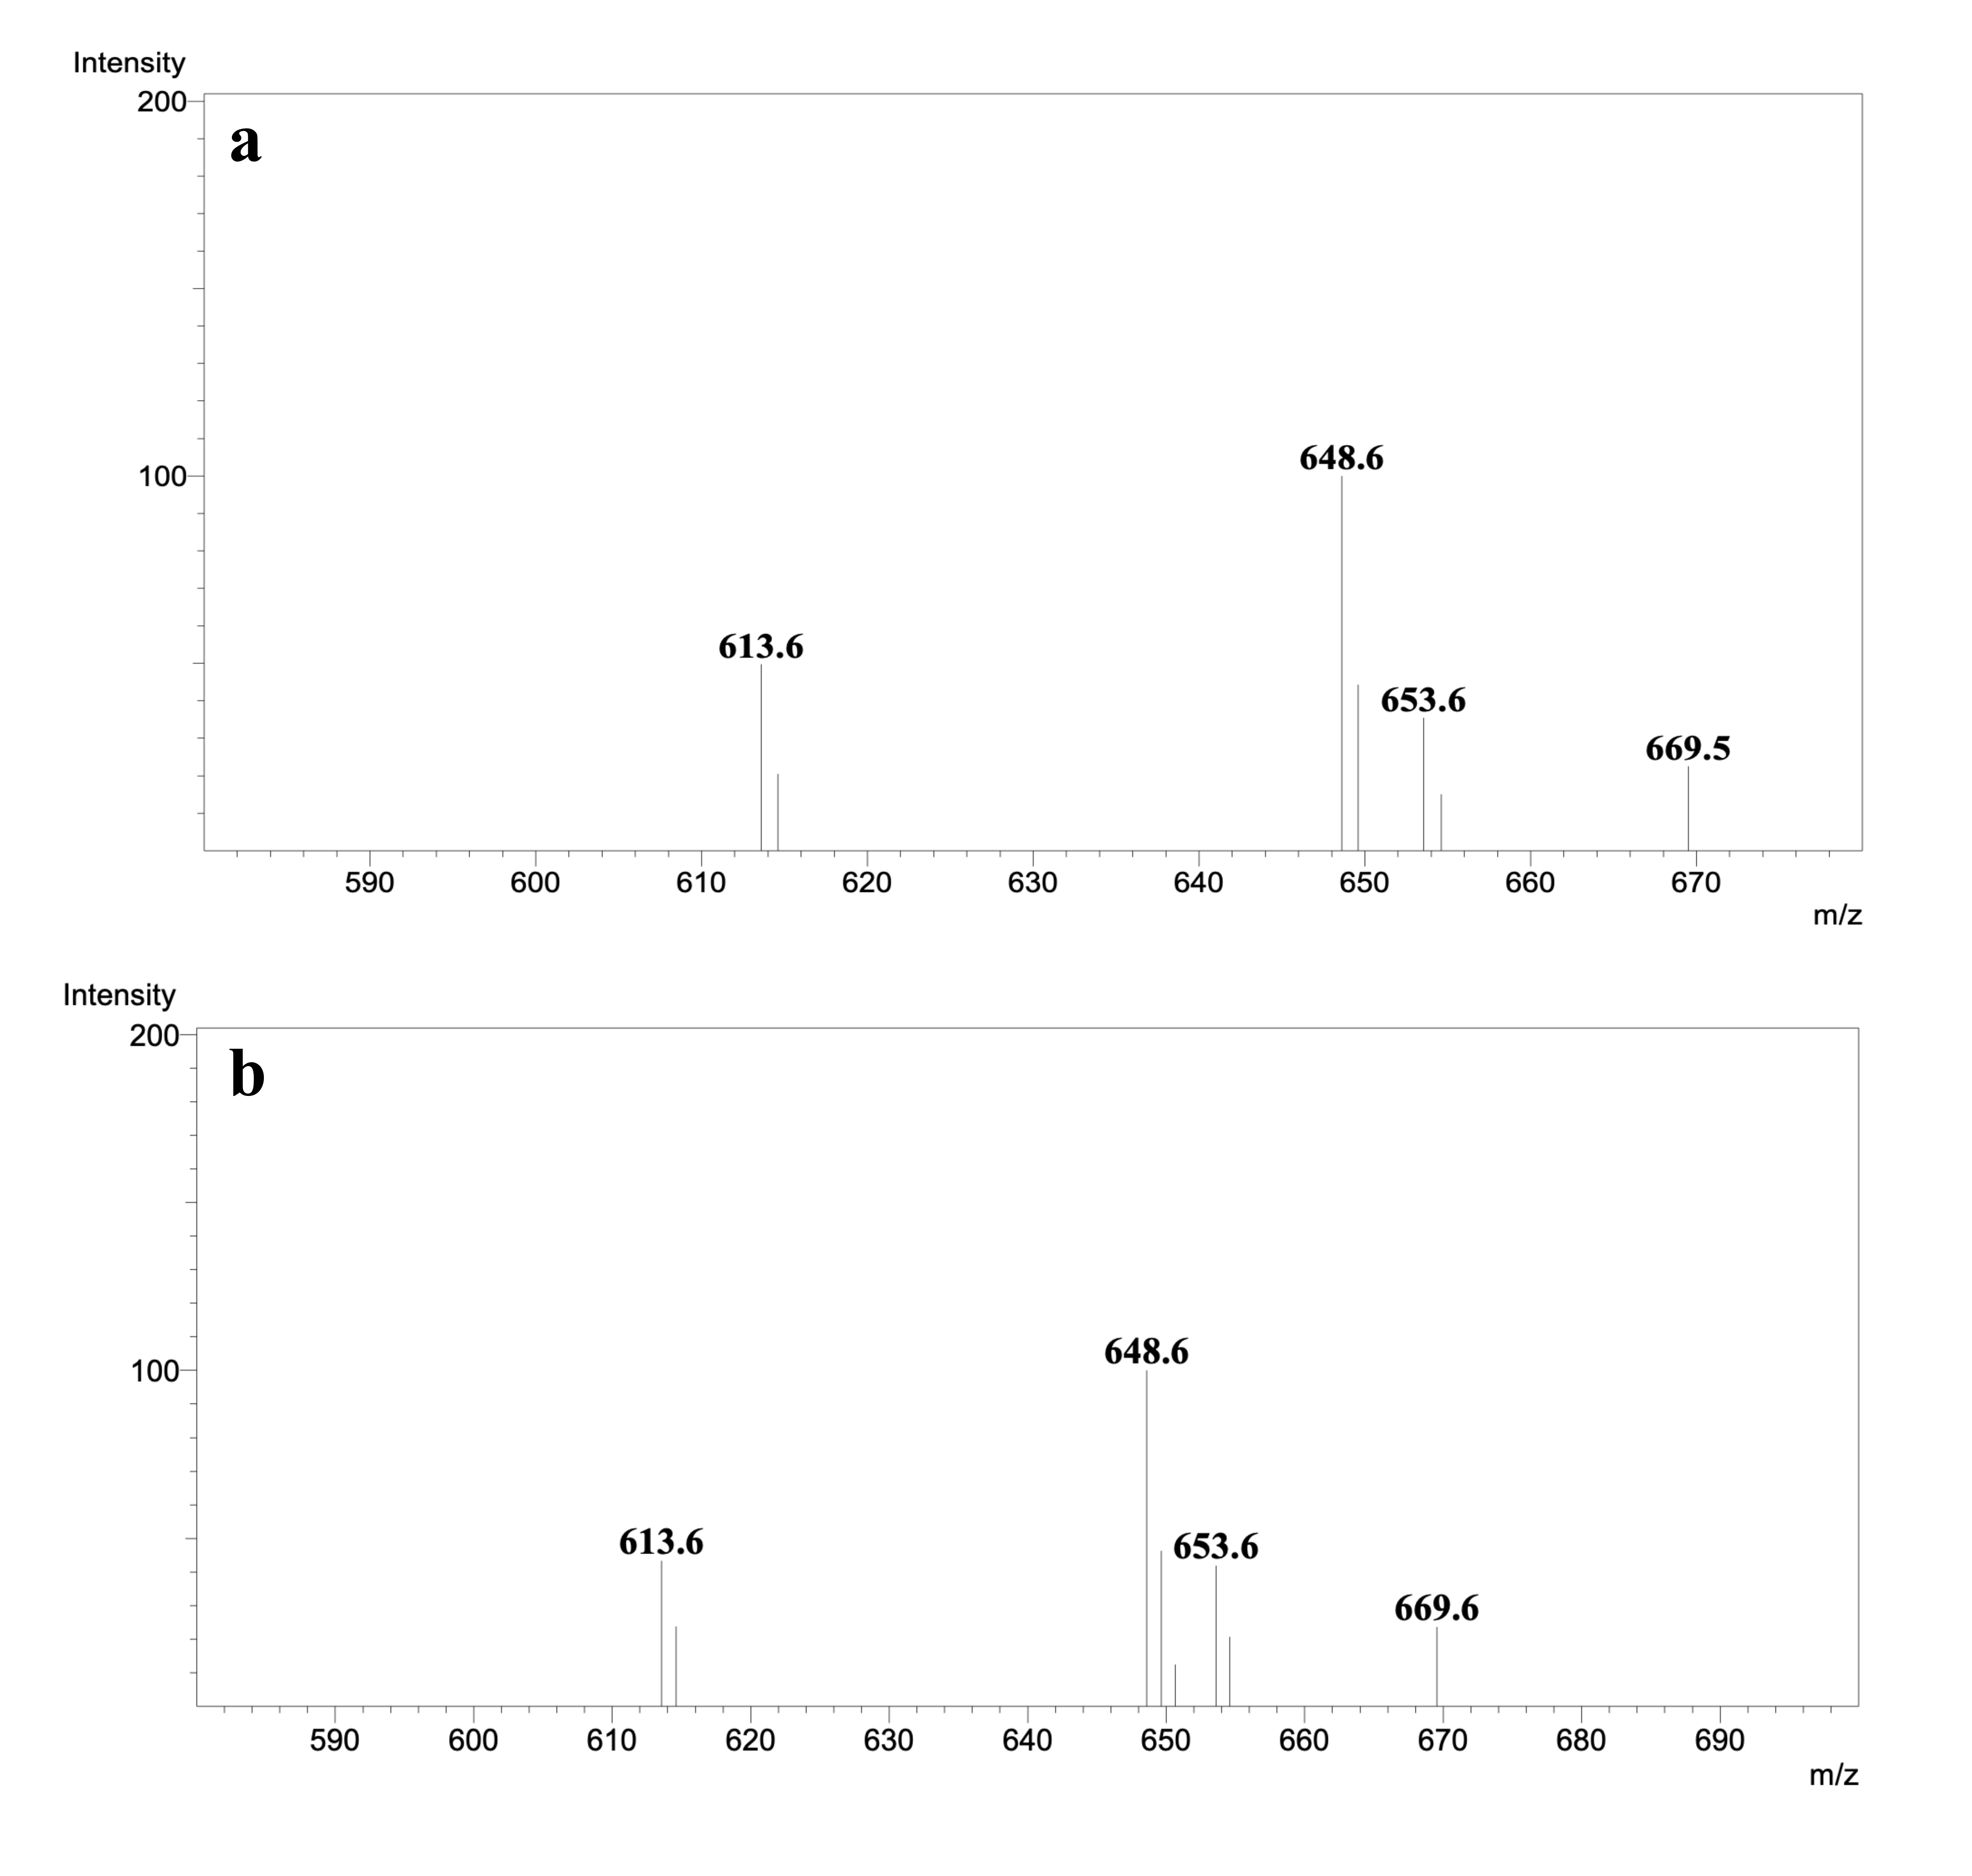


**Figure S1.** Mass spectrum obtained in positive SCAN mode at m/z 635 [M+H] ⁺. (a) solanesol standard, (b) crude extract.


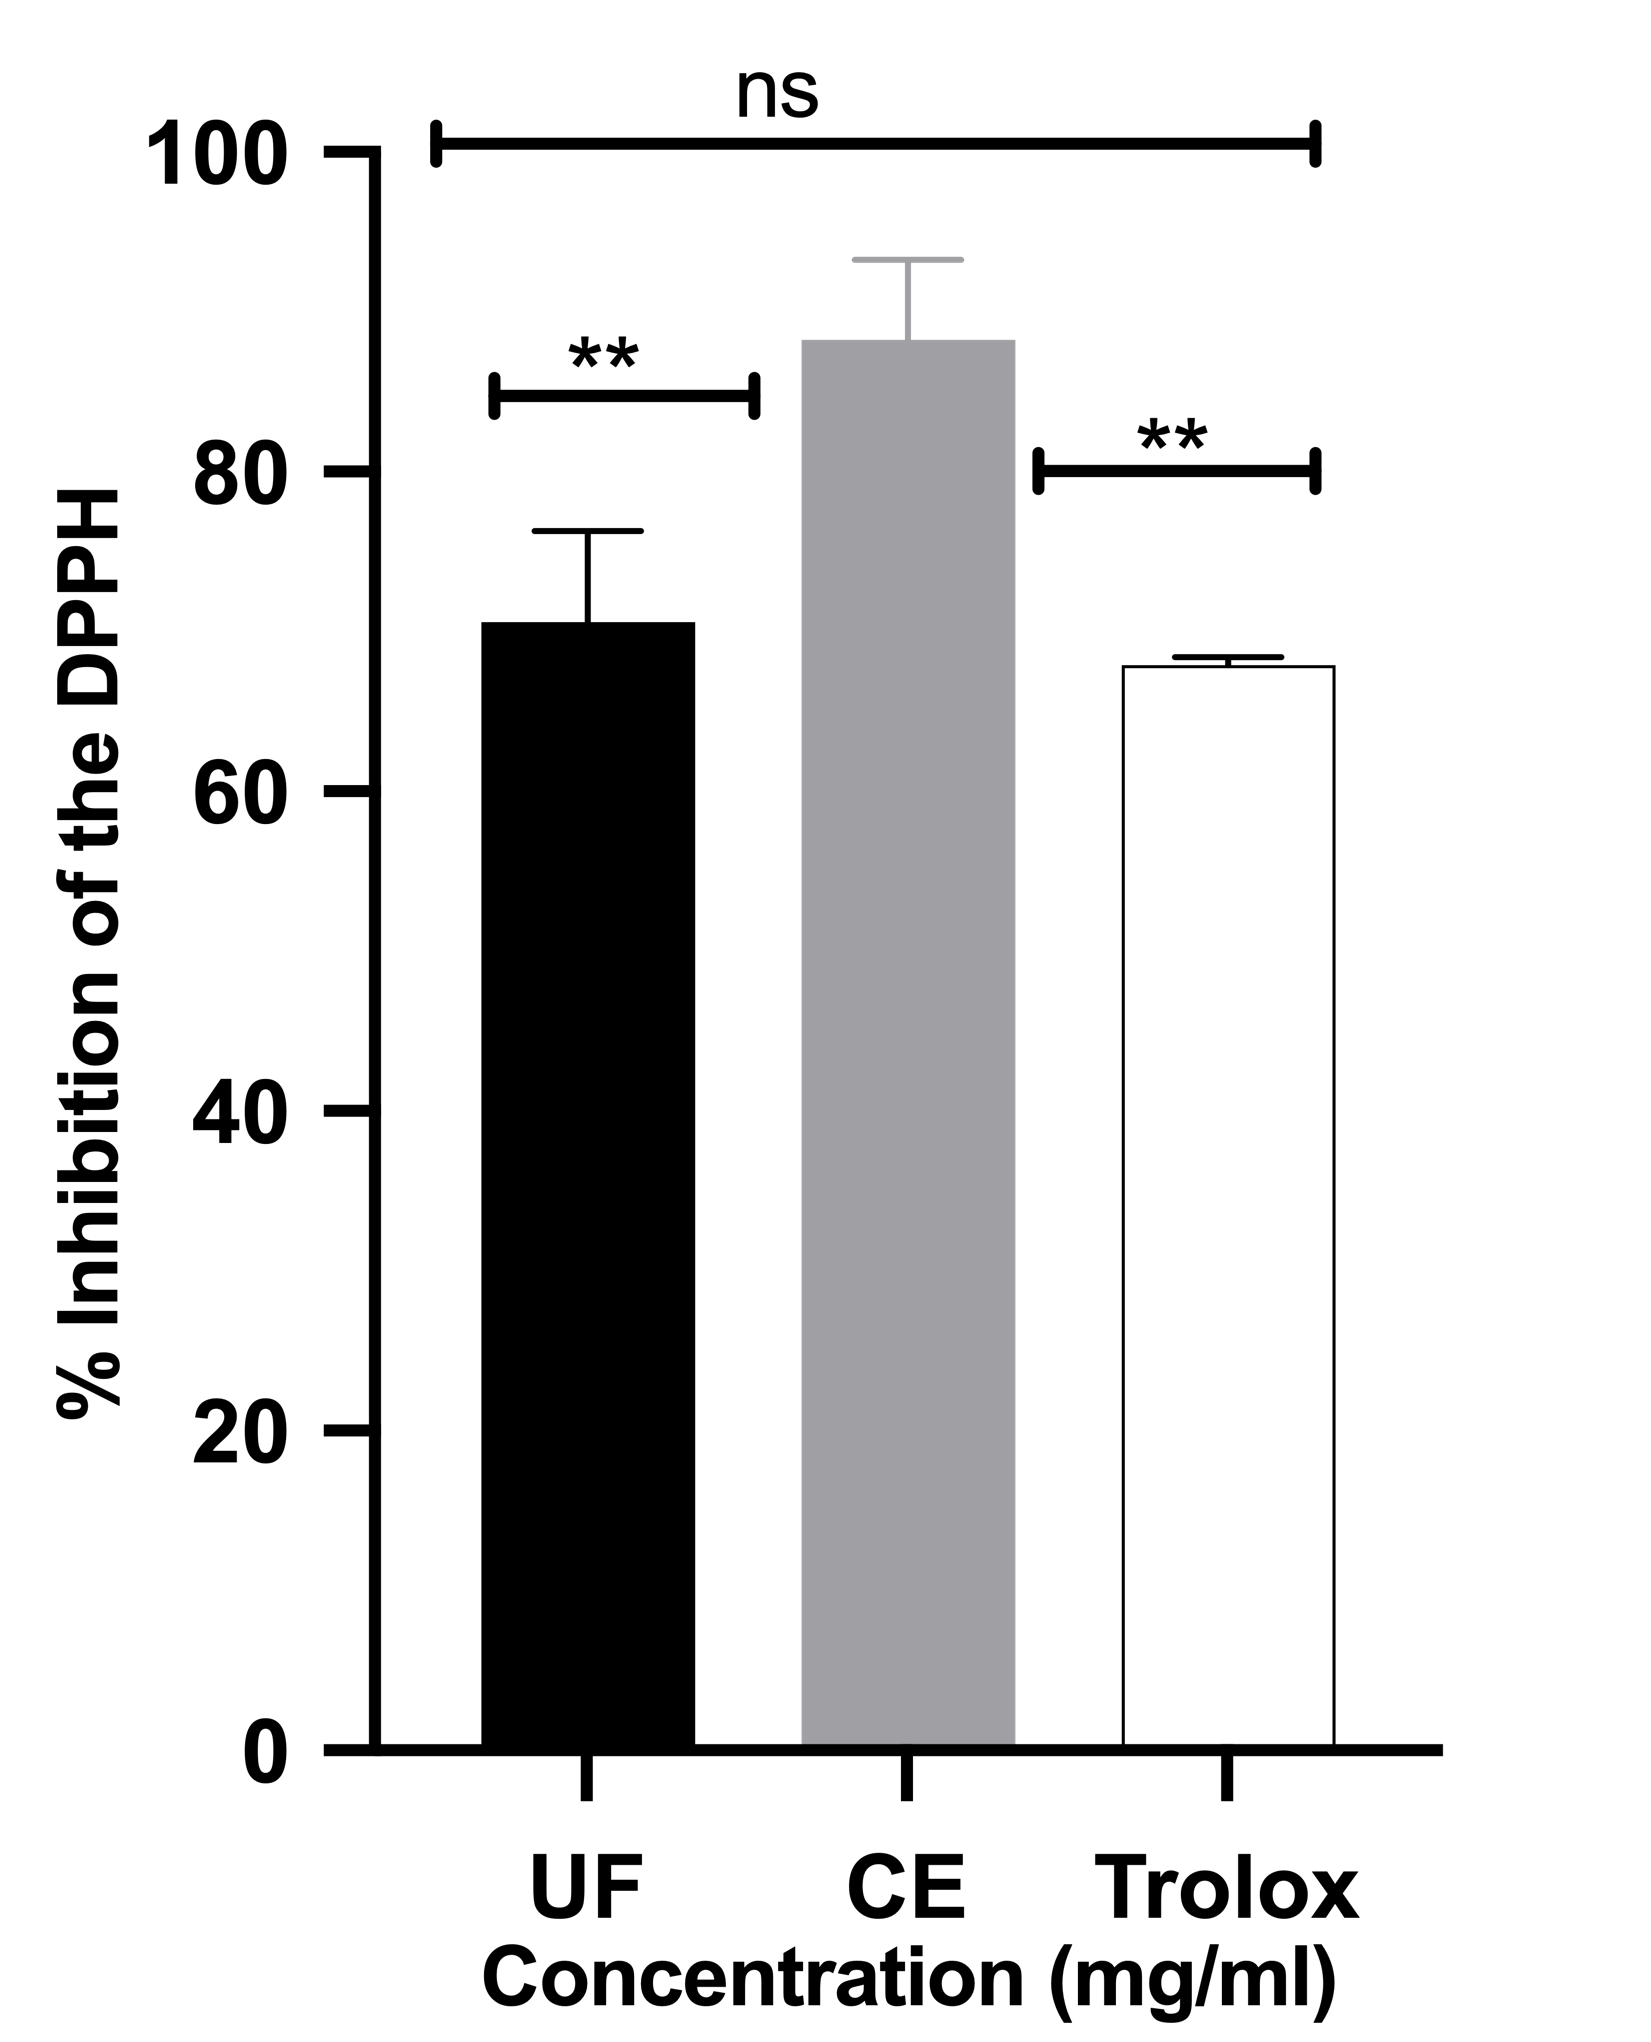


**Fig. S2.** DPPH radical inhibition, expressed as percentage of protection. Data are presented as the mean ± standard error of triplicates. *Different letters indicate statistically significant differences between means, according to one-way ANOVA, p < 0.05

**Table S1**. DPPH radical scavenging activity of the crude extract (CE), unified fraction (UF), and derived fractions from *Nicotiana tabacum* L. Values are expressed as mean ± SD. Inhibition percentages were determined at equivalent concentrations to allow comparison among samples.

| Samples | Inhibition (%) |
| --- | --- |
| F7 | 37.5 ± 0.08 |
| F8 | 60.8 ± 0.76 |
| F9 | 69.3 ± 0.26 |
| F10 | 30.6 ± 0.35 |
| UF | 70.57 ± 0.05 |
| CE | 88.25 ± 0.05 |
| Trolox | 86.6 ± 0.009 |


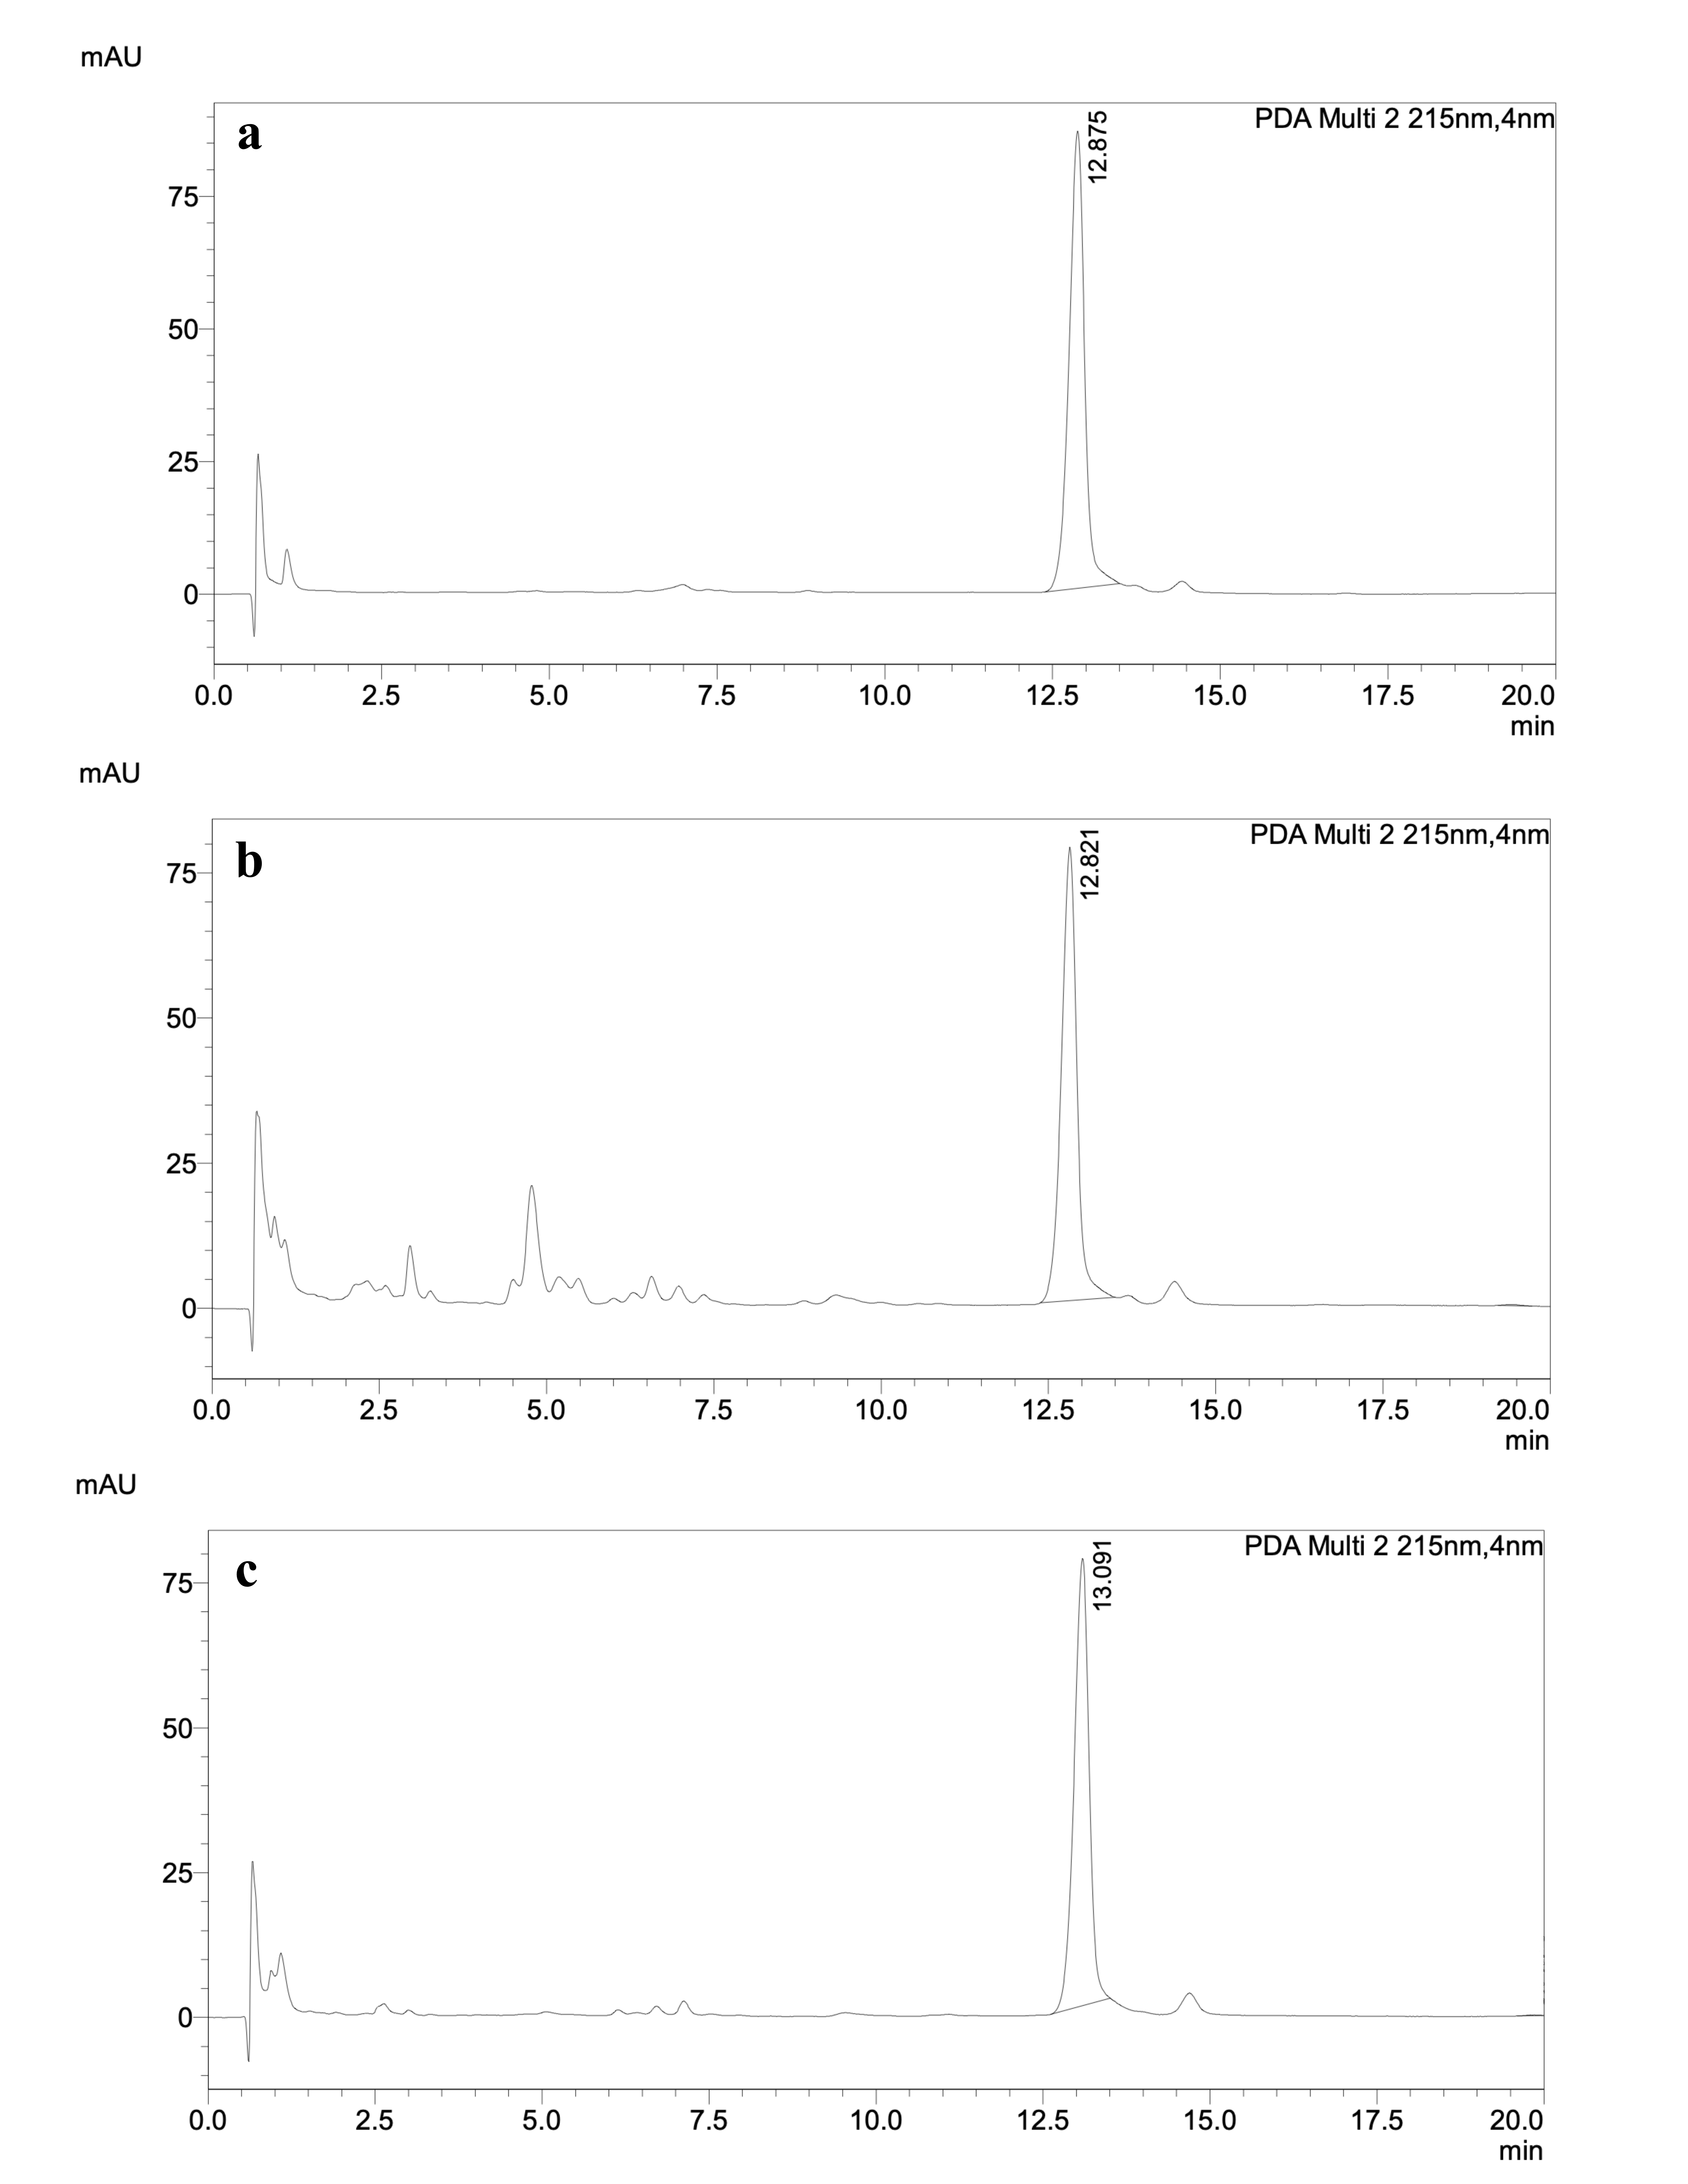


**Figure S2.** Chromatogram of solanesol at 215 nm. (a)solanesol standard, (b) crude extract, and (c) fraction 7-14
